# Supplementary material for: Combining rTMS With Intensive Language-Action Therapy in Chronic Aphasia: A Randomized Controlled Trial
Source: PubMed Central journal article supplement (PMC6369187; doi:10.3389/fnins.2018.01036), 2019-02-04
Supplement: Table_1.pdf [file Table_1.pdf]

### Supplement 1. Motor thresholds and Stimulation values

| Subject                      | Motor threshold means | V/m means |
|------------------------------|-----------------------|-----------|
| <b>Group A</b>               |                       |           |
| 1                            | 36                    | 61        |
| 2                            | 41                    | 66        |
| 3                            | 38                    | 36        |
| 4                            | 68                    | 90        |
| 5                            | 26                    | 38        |
| 6                            | 40                    | 51        |
| 7                            | 28                    | 55        |
| 8                            | 26                    | 40        |
| 9                            | 37                    | 55        |
| Group A means (rTMS)         | <b>38</b>             | <b>55</b> |
| <b>Group B</b>               |                       |           |
| 10 placebo                   | 39                    | 4         |
| 11 placebo                   | 33                    | 4         |
| 12 placebo                   | 38                    | 4         |
| 13 placebo                   | 76                    | 8         |
| 14 placebo                   | 36                    | 4         |
| 15 placebo                   | 74                    | 8         |
| 16 placebo                   | 35                    | 4         |
| 17 placebo                   | 34                    | 5         |
| Group B (placebo rTMS) means | <b>46</b>             | <b>5</b>  |

V/m was estimated at the stimulated cortex. The values for the placebo group B are approximately 10% of the ones considered to excite the cortex (Casali et al., 2010).
